# Supplementary material for: Predictive mapping of the global power system using open data
Source: PubMed Central journal article supplement (PMC6962213; doi:10.1038/s41597-019-0347-4), 2020-01-15
Supplement: 41597_2019_347_MOESM1_ESM.pdf [file 41597_2019_347_MOESM1_ESM.pdf]

## Supplementary Information for:

# Predictive mapping of the global power system using open data

### Authors

C. J. Arderne<sup>1</sup>, C. Zorn<sup>2,3</sup>, C. Nicolas<sup>1</sup>, E.E. Koks<sup>2,4</sup>

### Affiliations

1. World Bank Group, Washington, D.C., USA
2. Environmental Change Institute, University of Oxford, Oxford, UK
3. Dept. Of Civil and Environmental Engineering, University of Auckland, Auckland, New Zealand
4. Vrije Universiteit Amsterdam, Amsterdam, The Netherlands

Corresponding author(s): Chris Arderne ([carderne@worldbank.org](mailto:carderne@worldbank.org))

### Table of Contents

|                                                                                                                                                                                                                               |   |
|-------------------------------------------------------------------------------------------------------------------------------------------------------------------------------------------------------------------------------|---|
| <b>Supplementary Figure 1.</b> Examples varying grid resolution for validation. Examples are shown for Bolivia across multiple resolutions.....                                                                               | 2 |
| <b>Supplementary Figure 2.</b> Analysis of accuracy, precision, and IOU across the validation dataset. Bold lines indicate the combined global results.....                                                                   | 3 |
| <b>Supplementary Table 1.</b> Validation Results by country. Grid resolution, accuracy percentage, and precision values all rounded to nearest integer.....                                                                   | 4 |
| <b>Supplementary Figure 3.</b> Confusion matrix table with collated results across the complete validation set with a validation grid resolution of 15 km.....                                                                | 5 |
| <b>Supplementary Figure 4.</b> Validation performance across accuracy and precision metrics. Marker color represents World Bank income group and size represents World Bank estimated population with electricity access..... | 5 |
| <b>Supplementary Figure 5.</b> Modelled electricity access rates compared with World Bank statistics.....                                                                                                                     | 6 |
| <b>Supplementary Table 2.</b> Raw summary of results aggregated to country levels.....                                                                                                                                        | 7 |

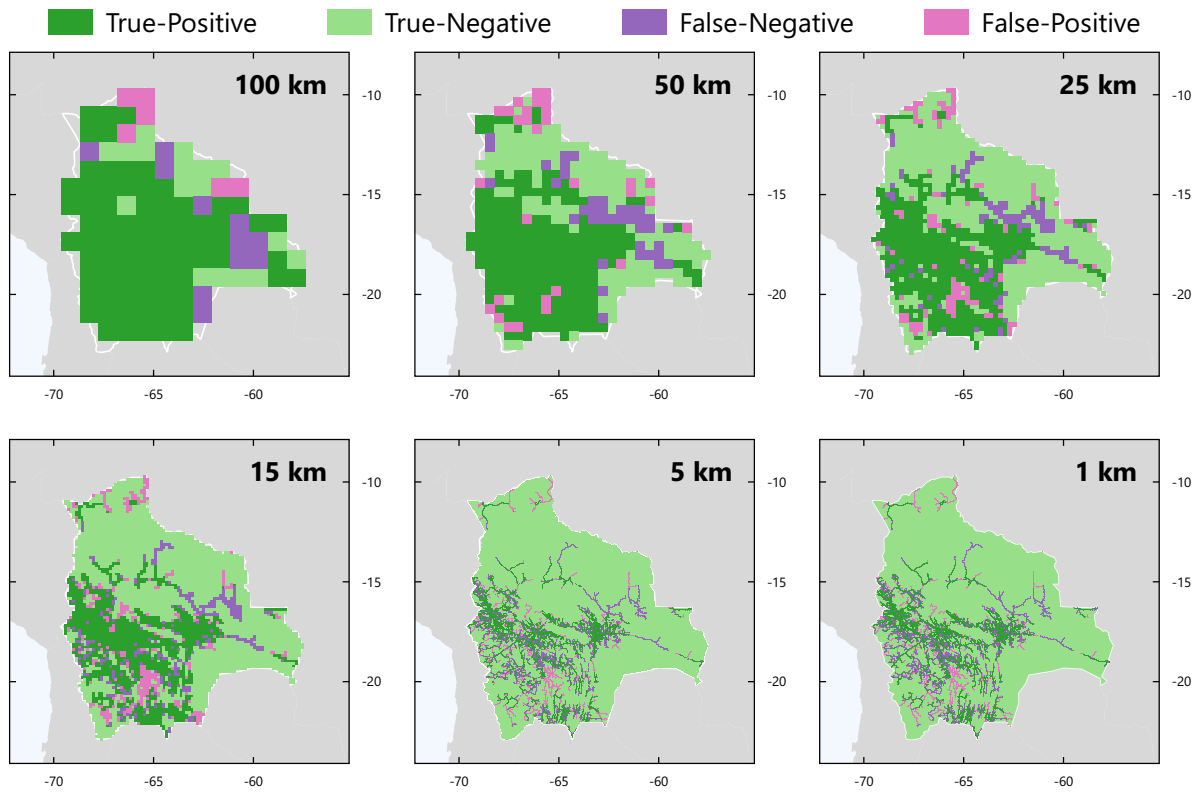

**Supplementary Figure 1. Examples varying grid resolution for validation. Examples are shown for Bolivia across multiple resolutions. We see the effect that larger grid sizes (i.e. 100 km) show better predictive capacity, but do not represent the network necessarily well compared to those  $\leq 15$  km which better reveal the networks true topology.**

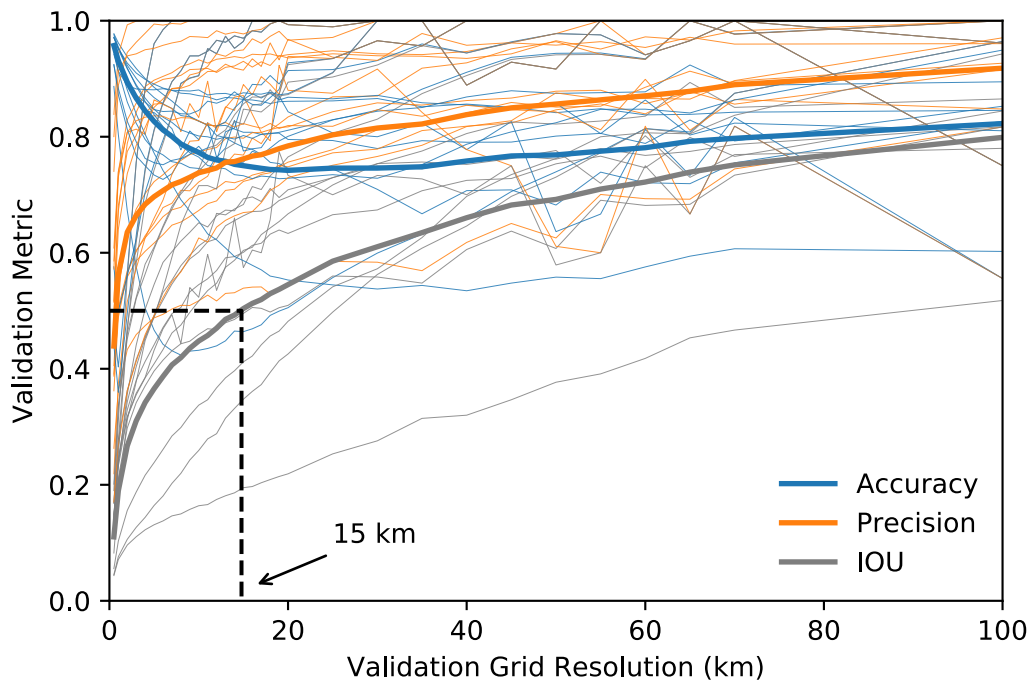

**Supplementary Figure 2. Analysis of accuracy, precision, and IOU across the validation dataset. Bold lines indicate the combined global results.** Finding the grid resolution of which we can report results with most confidence will depend on the accuracy, precision, and IOU metrics highlighted in the Technical Validation. Median and mean are not considered as this would equally weight each network with potentially misleading results given some datasets are considerably smaller than others (particularly the High Income group countries. When combining all validation grids, a 15 km grid resolution is required to attain  $\text{IOU} \geq 0.5$  (dotted line). Therefore, on the whole, *gridfinder* performs better (or the same) for all Low and Lower-Middle income group countries if the 15 km validation grid is assumed (in 8 out of 9 countries). This is similarly reflected in the accuracy and precision metrics for the global validation resolution. At the 15 km resolution, High and Upper-Middle income group countries are all expected to underperform with 3 out of 6 countries requiring  $> 22$  km validation grids to reach  $\text{IOU} \geq 0.5$ .

**Supplementary Table 1. Validation Results by country. Grid resolution, accuracy percentage, and precision values all rounded to nearest integer.** Accuracy is highest for the largest grid sizes as expected due to the significant increase in (and ease of) TN predictions. In comparison, precision and IOU both increase as the grid cell sizes increase. The IOU has the greatest variability with the lower end representing Queensland (Australia) where *gridfinder* under predicts the presence of MV lines. With the exception of Zambia, all Low Income and Lower-Middle countries reach  $IOU \geq 0.5$  for resolutions  $\leq 9$ km.

| Country         | Income Group | Electricity Access (%) | Resolution for $IOU \geq 0.5$ | Accuracy at this resolution | Precision at this resolution | Accuracy at 15 km | Precision at 15 km |
|-----------------|--------------|------------------------|-------------------------------|-----------------------------|------------------------------|-------------------|--------------------|
| Australia (WA)  | High         | 100%                   | 25 km                         | 56%                         | 94%                          | 46%               | 93%                |
| Australia (QLD) | High         | 100%                   | 90 km                         | 60%                         | 96%                          | 59%               | 94%                |
| Bolivia         | Lower Middle | 91.8%                  | 5 km                          | 89%                         | 73%                          | 86%               | 80%                |
| Burundi         | Low          | 9.3%                   | 5 km                          | 73%                         | 67%                          | 86%               | 89%                |
| Ethiopia        | Low          | 44.3%                  | 9 km                          | 81%                         | 66%                          | 80%               | 72%                |
| Kenya           | Lower Middle | 63.8%                  | 4 km                          | 88%                         | 83%                          | 88%               | 82%                |
| Malawi          | Low          | 12.7%                  | 3 km                          | 88%                         | 79%                          | 87%               | 91%                |
| Namibia         | Upper Middle | 52.5%                  | 22 km                         | 73%                         | 74%                          | 73%               | 67%                |
| Netherlands     | High         | 100%                   | 2 km                          | 53%                         | 98%                          | 100%              | 100%               |
| New Zealand     | High         | 100%                   | 9 km                          | 80%                         | 84%                          | 78%               | 87%                |
| Nigeria         | Lower Middle | 54.4%                  | 3 km                          | 80%                         | 77%                          | 86%               | 95%                |
| Tanzania        | Low          | 32.8%                  | 7 km                          | 84%                         | 68%                          | 81%               | 73%                |
| Uganda          | Low          | 22.0%                  | 5 km                          | 78%                         | 66%                          | 76%               | 77%                |
| UK (NW)         | High         | 100%                   | 2 km                          | 58%                         | 95%                          | 96%               | 100%               |
| UK (Western)    | High         | 100%                   | 2 km                          | 53%                         | 94%                          | 97%               | 98%                |
| Zambia          | Lower Middle | 40.3%                  | 15 km                         | 78%                         | 54%                          | 78%               | 54%                |
| <b>Global</b>   |              | <b>46.98%</b>          | <b>15 km</b>                  | <b>75%</b>                  | <b>76%</b>                   | <b>75%</b>        | <b>76%</b>         |

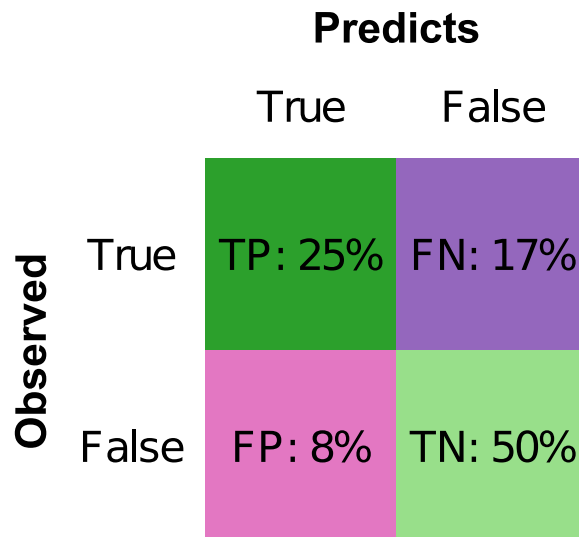

**Supplementary Figure 3. Confusion matrix table with collated results across the complete validation set with a validation grid resolution of 15 km.** At this scale, approximately 27% of data are located in High Income countries, 10% in Upper-Middle Income, 32% in Lower-Middle Income, and 31% in Low Income countries.

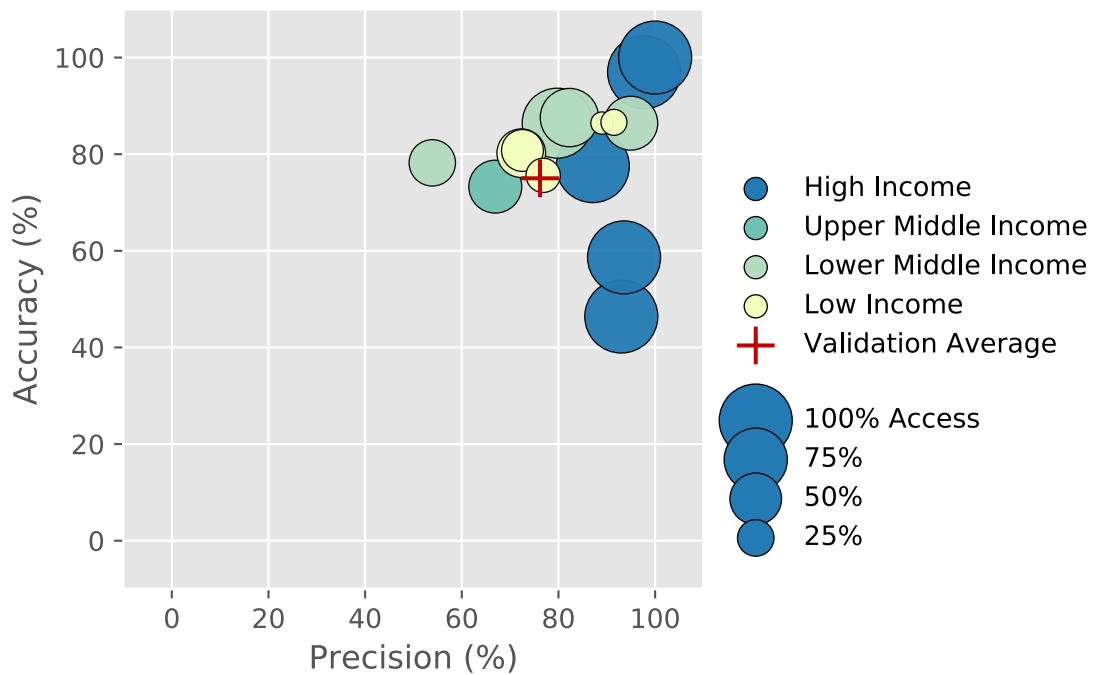

**Supplementary Figure 4. Validation performance across accuracy and precision metrics. Marker color represents World Bank income group and size represents World Bank estimated population with electricity access.** While all networks show validation precision of >50%, lower accuracies are observed for Australia (both Queensland and Western Australia). Validation performance does not necessarily correlate directly with country income group.

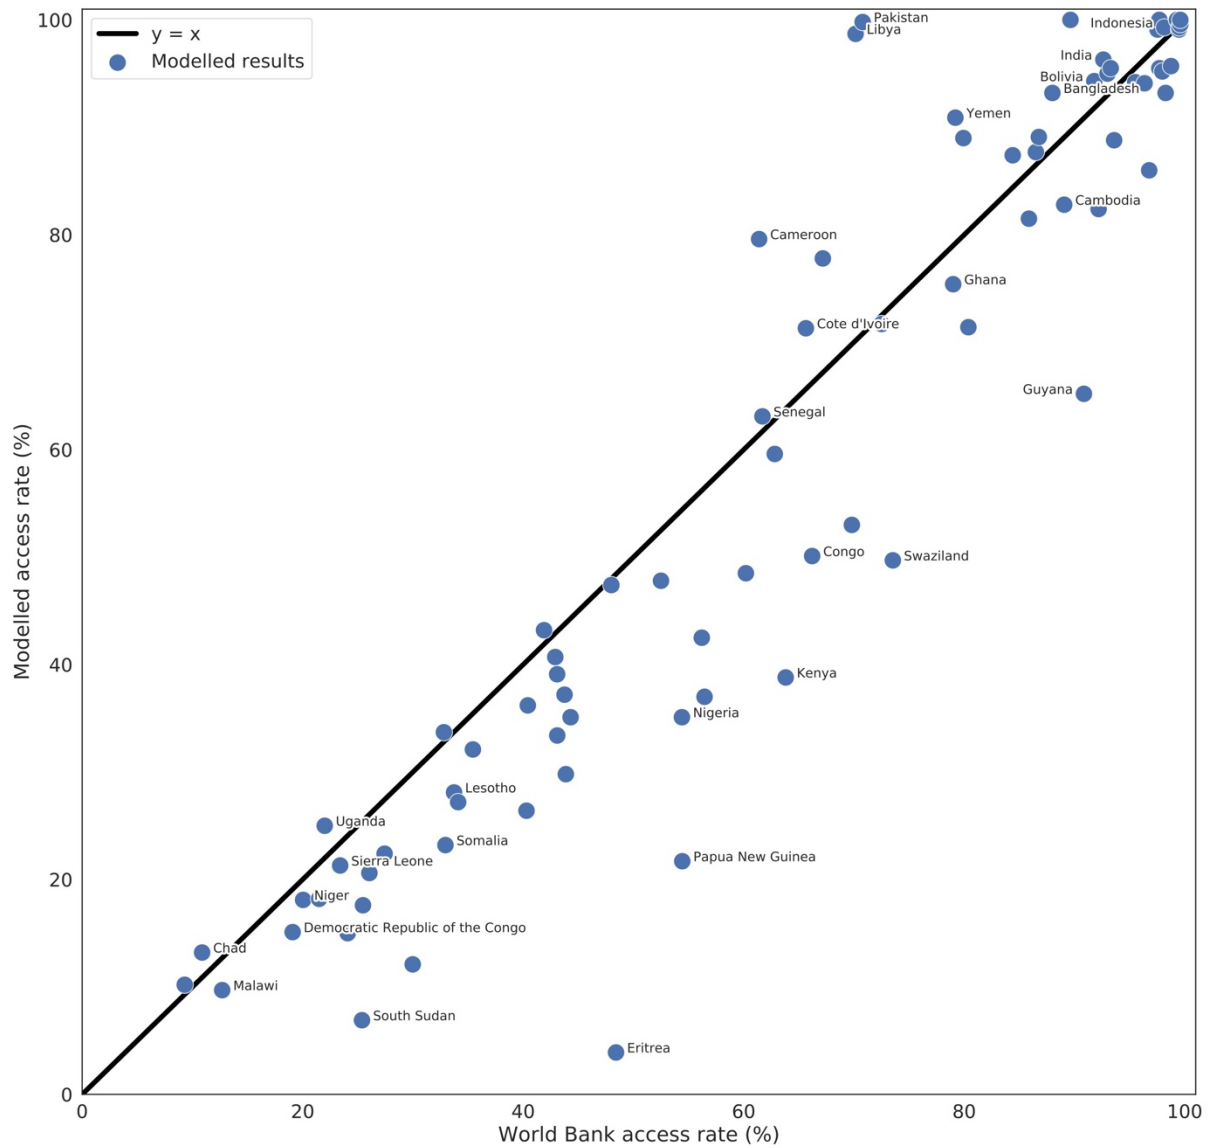

**Supplementary Figure 5. Modelled electricity access rates compared with World Bank statistics.** There appear to be significant areas of False-Negative predictions (*gridfinder* does not predict the presence of an observed line) in the Australian based validation sets.

**Supplementary Table 2. Raw summary of results aggregated to country levels.** While each of the high income countries have universal access to electricity, the relationship between accessibility and income groups are not as clear for the remaining countries Upper-Middle, Lower-Middle, and Low Income groupings are not as clear. Bolivia and Zambia being one such example for Lower-Middle income countries with 91.8% and 40.3% electricity access, respectively. This equate to over 50% more of the Bolivian population with electricity access, yet is still classified in the same Income Group as Zambia. Similarly, Namibia (classified as Upper Middle income) has lower accessibility rates than a range of Lower-Middle income groups (Bolivia, Kenya, and Nigeria).

| Country                  | Code | Total MV (km) | Total LV (km) | Population with 10km of MV (%) | MV investment per capita (USD) | Modelled access rate (%) | World Bank access rate (%) |
|--------------------------|------|---------------|---------------|--------------------------------|--------------------------------|--------------------------|----------------------------|
| Afghanistan              | AFG  | 13,348        | 28,069        | 77%                            | 12                             | 96%                      | 98%                        |
| Albania                  | ALB  | 4,215         | 51,793        | 100%                           | 44                             | 100%                     | 100%                       |
| Algeria                  | DZA  | 49,430        | 484,832       | 99%                            | 37                             | 100%                     | 100%                       |
| Andorra                  | AND  | 61            | 1,272         | 100%                           | 26                             | 97%                      | 100%                       |
| Angola                   | AGO  | 26,655        | 6,343         | 91%                            | 32                             | 43%                      | 42%                        |
| Antigua and Barbuda      | ATG  | 116           | 1,998         | 100%                           | 38                             | 99%                      | 100%                       |
| Argentina                | ARG  | 92,329        | 590,015       | 99%                            | 63                             | 100%                     | 100%                       |
| Armenia                  | ARM  | 3,037         | 50,060        | 100%                           | 30                             | 99%                      | 100%                       |
| Aruba                    | ABW  | 6             | 2,555         | 32%                            | 2                              | 100%                     | 100%                       |
| Australia                | AUS  | 61,657        | 544,198       | 98%                            | 77                             | 100%                     | 100%                       |
| Austria                  | AUT  | 15,936        | 227,175       | 100%                           | 55                             | 100%                     | 100%                       |
| Azerbaijan               | AZE  | 13,901        | 170,807       | 100%                           | 42                             | 100%                     | 100%                       |
| Bahamas                  | BHS  | 793           | 7,873         | 95%                            | 63                             | 100%                     | 100%                       |
| Bahrain                  | BHR  | 242           | 23,737        | 100%                           | 5                              | 100%                     | 100%                       |
| Bangladesh               | BGD  | 24,191        | 50,586        | 100%                           | 4                              | 93%                      | 88%                        |
| Belarus                  | BLR  | 31,188        | 141,516       | 100%                           | 98                             | 100%                     | 100%                       |
| Belgium                  | BEL  | 12,434        | 294,751       | 100%                           | 32                             | 100%                     | 100%                       |
| Belize                   | BLZ  | 1,139         | 583           | 101%                           | 89                             | 93%                      | 98%                        |
| Benin                    | BEN  | 6,354         | 3,684         | 98%                            | 17                             | 39%                      | 43%                        |
| Bhutan                   | BTN  | 1,898         | 36,577        | 94%                            | 60                             | 100%                     | 98%                        |
| Bolivia                  | BOL  | 27,344        | 10,801        | 96%                            | 76                             | 94%                      | 92%                        |
| Bosnia and Herzegovina   | BIH  | 8,804         | 66,589        | 100%                           | 68                             | 100%                     | 100%                       |
| Botswana                 | BWA  | 9,394         | 1,739         | 97%                            | 122                            | 60%                      | 63%                        |
| Brazil                   | BRA  | 370,664       | 3,105,837     | 99%                            | 54                             | 100%                     | 100%                       |
| Brunei Darussalam        | BRN  | 699           | 11,133        | 100%                           | 49                             | 100%                     | 100%                       |
| Bulgaria                 | BGR  | 21,083        | 156,199       | 100%                           | 88                             | 100%                     | 100%                       |
| Burkina Faso             | BFA  | 9,475         | 2,355         | 81%                            | 16                             | 18%                      | 25%                        |
| Burundi                  | BDI  | 1,764         | 621           | 97%                            | 5                              | 10%                      | 9%                         |
| Cambodia                 | KHM  | 12,654        | 13,454        | 99%                            | 24                             | 83%                      | 89%                        |
| Cameroon                 | CMR  | 14,248        | 14,128        | 80%                            | 18                             | 80%                      | 61%                        |
| Canada                   | CAN  | 180,729       | 713,812       | 99%                            | 156                            | 100%                     | 100%                       |
| Central African Republic | CAF  | 2,419         | 387           | 36%                            | 14                             | 12%                      | 30%                        |
| Chad                     | TCD  | 4,608         | 944           | 49%                            | 10                             | 13%                      | 11%                        |

| Country                          | Code | Total MV (km) | Total LV (km) | Population with 10km of MV (%) | MV investment per capita (USD) | Modelled access rate (%) | World Bank access rate (%) |
|----------------------------------|------|---------------|---------------|--------------------------------|--------------------------------|--------------------------|----------------------------|
| Chile                            | CHL  | 24,889        | 236,444       | 99%                            | 42                             | 100%                     | 100%                       |
| China                            | CHN  | 795,935       | 17,217,180    | 100%                           | 17                             | 100%                     | 100%                       |
| Colombia                         | COL  | 50,765        | 500,167       | 98%                            | 32                             | 100%                     | 100%                       |
| Comoros                          | COM  | 67            | 445           | 20%                            | 3                              | 89%                      | 80%                        |
| Congo                            | COG  | 8,181         | 1,555         | 83%                            | 50                             | 50%                      | 66%                        |
| Costa Rica                       | CRI  | 8,112         | 79,899        | 100%                           | 50                             | 100%                     | 100%                       |
| Cote d'Ivoire                    | CIV  | 19,252        | 18,379        | 97%                            | 25                             | 71%                      | 66%                        |
| Croatia                          | HRV  | 13,415        | 105,975       | 100%                           | 93                             | 100%                     | 100%                       |
| Cuba                             | CUB  | 15,104        | 146,668       | 100%                           | 40                             | 100%                     | 100%                       |
| Cyprus                           | CYP  | 1,524         | 18,332        | 100%                           | 54                             | 99%                      | 100%                       |
| Czech Republic                   | CZE  | 24,201        | 253,374       | 100%                           | 68                             | 100%                     | 100%                       |
| Democratic Republic of the Congo | COD  | 40,450        | 6,692         | 66%                            | 16                             | 15%                      | 19%                        |
| Denmark                          | DNK  | 11,927        | 142,199       | 100%                           | 63                             | 100%                     | 100%                       |
| Djibouti                         | DJI  | 694           | 165           | 96%                            | 24                             | 49%                      | 60%                        |
| Dominica                         | DMA  | 123           | 1,202         | 100%                           | 51                             | 100%                     | 100%                       |
| Dominican Republic               | DOM  | 6,177         | 127,870       | 100%                           | 17                             | 100%                     | 100%                       |
| Ecuador                          | ECU  | 23,173        | 240,672       | 100%                           | 43                             | 100%                     | 100%                       |
| Egypt                            | EGY  | 27,463        | 851,766       | 100%                           | 9                              | 100%                     | 100%                       |
| El Salvador                      | SLV  | 3,892         | 74,872        | 100%                           | 19                             | 99%                      | 99%                        |
| Equatorial Guinea                | GNQ  | 1,961         | 684           | 99%                            | 65                             | 78%                      | 67%                        |
| Eritrea                          | ERI  | 1,603         | 158           | 73%                            | 9                              | 4%                       | 48%                        |
| Estonia                          | EST  | 6,801         | 24,803        | 100%                           | 154                            | 100%                     | 100%                       |
| Ethiopia                         | ETH  | 31,272        | 11,130        | 90%                            | 9                              | 35%                      | 44%                        |
| Faroe Islands                    | FRO  | 474           | 3,487         | 100%                           | 295                            | 100%                     | 100%                       |
| Finland                          | FIN  | 32,924        | 101,564       | 99%                            | 182                            | 100%                     | 100%                       |
| France                           | FRA  | 118,566       | 1,607,007     | 100%                           | 55                             | 100%                     | 100%                       |
| Gabon                            | GAB  | 5,387         | 1,932         | 88%                            | 90                             | 82%                      | 92%                        |
| Gambia                           | GMB  | 477           | 666           | 76%                            | 7                              | 43%                      | 56%                        |
| Georgia                          | GEO  | 7,546         | 89,066        | 100%                           | 56                             | 100%                     | 100%                       |
| Germany                          | DEU  | 104,401       | 1,856,241     | 100%                           | 39                             | 100%                     | 100%                       |
| Ghana                            | GHA  | 22,350        | 18,625        | 100%                           | 24                             | 75%                      | 79%                        |
| Greece                           | GRC  | 28,570        | 211,808       | 100%                           | 78                             | 100%                     | 100%                       |
| Guatemala                        | GTM  | 12,542        | 14,366        | 100%                           | 23                             | 96%                      | 93%                        |
| Guinea                           | GIN  | 9,509         | 2,924         | 82%                            | 22                             | 32%                      | 35%                        |
| Guinea-Bissau                    | GNB  | 211           | 269           | 13%                            | 3                              | 21%                      | 26%                        |
| Guyana                           | GUY  | 1,602         | 580           | 86%                            | 62                             | 65%                      | 91%                        |
| Haiti                            | HTI  | 1,891         | 3,699         | 94%                            | 5                              | 37%                      | 44%                        |
| Honduras                         | HND  | 12,172        | 9,822         | 98%                            | 45                             | 88%                      | 87%                        |
| Hungary                          | HUN  | 21,037        | 237,756       | 100%                           | 64                             | 100%                     | 100%                       |
| Iceland                          | ISL  | 8,333         | 5,172         | 98%                            | 770                            | 96%                      | 100%                       |
| India                            | IND  | 693,102       | 604,416       | 100%                           | 16                             | 96%                      | 93%                        |
| Indonesia                        | IDN  | 134,709       | 3,321,484     | 96%                            | 16                             | 99%                      | 98%                        |



| Country                                    | Code | Total MV (km) | Total LV (km) | Population with 10km of MV (%) | MV investment per capita (USD) | Modelled access rate (%) | World Bank access rate (%) |
|--------------------------------------------|------|---------------|---------------|--------------------------------|--------------------------------|--------------------------|----------------------------|
| Iran, Islamic Republic of                  | IRN  | 167,159       | 877,169       | 100%                           | 63                             | 100%                     | 100%                       |
| Iraq                                       | IRQ  | 35,209        | 377,162       | 100%                           | 29                             | 100%                     | 100%                       |
| Ireland                                    | IRL  | 16,394        | 111,745       | 100%                           | 104                            | 100%                     | 100%                       |
| Israel                                     | ISR  | 4,350         | 123,292       | 100%                           | 15                             | 100%                     | 100%                       |
| Italy                                      | ITA  | 72,253        | 1,293,927     | 100%                           | 36                             | 100%                     | 100%                       |
| Jamaica                                    | JAM  | 2,847         | 58,901        | 100%                           | 31                             | 99%                      | 100%                       |
| Japan                                      | JPN  | 68,597        | 2,122,796     | 100%                           | 16                             | 100%                     | 100%                       |
| Jordan                                     | JOR  | 5,683         | 94,538        | 100%                           | 22                             | 100%                     | 100%                       |
| Kazakhstan                                 | KAZ  | 89,074        | 254,192       | 99%                            | 150                            | 100%                     | 100%                       |
| Kenya                                      | KEN  | 18,577        | 9,191         | 88%                            | 12                             | 39%                      | 64%                        |
| Korea, Democratic People's Republic of     | PRK  | 8,838         | 10,913        | 97%                            | 10                             | 30%                      | 44%                        |
| Korea, Republic of                         | KOR  | 27,542        | 525,181       | 100%                           | 16                             | 100%                     | 100%                       |
| Kuwait                                     | KWT  | 2,113         | 44,258        | 100%                           | 16                             | 100%                     | 100%                       |
| Kyrgyzstan                                 | KGZ  | 12,289        | 76,676        | 99%                            | 60                             | 98%                      | 100%                       |
| Lao People's Democratic Republic           | LAO  | 10,985        | 12,540        | 92%                            | 45                             | 89%                      | 94%                        |
| Latvia                                     | LVA  | 8,328         | 30,678        | 100%                           | 126                            | 100%                     | 100%                       |
| Lebanon                                    | LBN  | 3,155         | 74,045        | 100%                           | 16                             | 100%                     | 100%                       |
| Lesotho                                    | LSO  | 1,485         | 760           | 95%                            | 21                             | 28%                      | 34%                        |
| Liberia                                    | LBR  | 2,854         | 864           | 82%                            | 19                             | 18%                      | 21%                        |
| Libya                                      | LYB  | 19,130        | 118,151       | 100%                           | 91                             | 99%                      | 70%                        |
| Liechtenstein                              | LIE  | 63            | 1,516         | 100%                           | 40                             | 96%                      | 100%                       |
| Lithuania                                  | LTU  | 8,862         | 48,168        | 100%                           | 91                             | 100%                     | 100%                       |
| Luxembourg                                 | LUX  | 1,137         | 15,348        | 100%                           | 57                             | 100%                     | 100%                       |
| Macedonia, the Former Yugoslav Republic of | MKD  | 4,292         | 39,260        | 100%                           | 62                             | 100%                     | 100%                       |
| Madagascar                                 | MDG  | 2,766         | 1,699         | 29%                            | 3                              | 15%                      | 24%                        |
| Malawi                                     | MWI  | 5,844         | 1,974         | 96%                            | 10                             | 10%                      | 13%                        |
| Malaysia                                   | MYS  | 36,252        | 561,323       | 100%                           | 36                             | 100%                     | 100%                       |
| Mali                                       | MLI  | 10,924        | 3,312         | 65%                            | 18                             | 33%                      | 43%                        |
| Malta                                      | MLT  | 146           | 7,493         | 100%                           | 10                             | 100%                     | 100%                       |
| Mauritania                                 | MRT  | 2,678         | 2,576         | 58%                            | 17                             | 41%                      | 43%                        |
| Mexico                                     | MEX  | 170,990       | 1,666,600     | 100%                           | 40                             | 100%                     | 100%                       |
| Moldova, Republic of                       | MDA  | 6,047         | 101,047       | 100%                           | 44                             | 100%                     | 100%                       |
| Mongolia                                   | MNG  | 24,657        | 1,710         | 89%                            | 249                            | 82%                      | 86%                        |
| Montenegro                                 | MNE  | 1,859         | 12,328        | 100%                           | 89                             | 100%                     | 100%                       |
| Montserrat                                 | MSR  | 11            | 171           | 100%                           | 61                             | 100%                     | 0%                         |
| Morocco                                    | MAR  | 38,574        | 410,302       | 99%                            | 34                             | 100%                     | 100%                       |
| Mozambique                                 | MOZ  | 15,838        | 4,333         | 81%                            | 17                             | 22%                      | 27%                        |
| Myanmar                                    | MMR  | 29,026        | 20,246        | 95%                            | 16                             | 53%                      | 70%                        |

| Country               | Code | Total MV (km) | Total LV (km) | Population with 10km of MV (%) | MV investment per capita (USD) | Modelled access rate (%) | World Bank access rate (%) |
|-----------------------|------|---------------|---------------|--------------------------------|--------------------------------|--------------------------|----------------------------|
| Namibia               | NAM  | 14,827        | 1,398         | 91%                            | 166                            | 48%                      | 53%                        |
| Nepal                 | NPL  | 10,445        | 41,525        | 96%                            | 10                             | 94%                      | 96%                        |
| Netherlands           | NLD  | 11,843        | 381,323       | 100%                           | 21                             | 100%                     | 100%                       |
| New Zealand           | NZL  | 12,168        | 106,508       | 99%                            | 81                             | 100%                     | 100%                       |
| Nicaragua             | NIC  | 6,429         | 4,207         | 96%                            | 32                             | 89%                      | 87%                        |
| Niger                 | NER  | 4,868         | 1,801         | 57%                            | 7                              | 18%                      | 20%                        |
| Nigeria               | NGA  | 51,599        | 40,712        | 95%                            | 8                              | 35%                      | 54%                        |
| Norway                | NOR  | 44,206        | 120,816       | 99%                            | 257                            | 100%                     | 100%                       |
| Oman                  | OMN  | 13,028        | 48,943        | 100%                           | 84                             | 99%                      | 100%                       |
| Pakistan              | PAK  | 81,767        | 1,395,834     | 98%                            | 13                             | 100%                     | 71%                        |
| Palestine, State of   | PSE  | 1,858         | 69,685        | 99%                            | 11                             | 100%                     | 100%                       |
| Panama                | PAN  | 5,796         | 4,256         | 97%                            | 44                             | 94%                      | 100%                       |
| Papua New Guinea      | PNG  | 7,222         | 892           | 67%                            | 29                             | 22%                      | 54%                        |
| Paraguay              | PRY  | 22,093        | 84,680        | 99%                            | 98                             | 100%                     | 99%                        |
| Peru                  | PER  | 46,837        | 360,173       | 95%                            | 45                             | 94%                      | 96%                        |
| Philippines           | PHL  | 31,829        | 103,710       | 98%                            | 10                             | 95%                      | 93%                        |
| Poland                | POL  | 88,883        | 809,844       | 100%                           | 69                             | 100%                     | 100%                       |
| Portugal              | PRT  | 23,334        | 236,687       | 95%                            | 67                             | 100%                     | 100%                       |
| Puerto Rico           | PRI  | 2,355         | 83,300        | 100%                           | 19                             | 100%                     | 100%                       |
| Qatar                 | QAT  | 1,609         | 23,568        | 99%                            | 22                             | 100%                     | 100%                       |
| Romania               | ROU  | 45,850        | 468,509       | 100%                           | 70                             | 100%                     | 100%                       |
| Russian Federation    | RUS  | 606,824       | 2,473,706     | 99%                            | 128                            | 100%                     | 100%                       |
| Rwanda                | RWA  | 2,426         | 1,973         | 100%                           | 6                              | 27%                      | 34%                        |
| Saint Kitts and Nevis | KNA  | 83            | 1,523         | 100%                           | 45                             | 100%                     | 100%                       |
| Saint Lucia           | LCA  | 163           | 2,930         | 100%                           | 26                             | 96%                      | 99%                        |
| Sao Tome and Principe | STP  | 125           | 103           | 96%                            | 20                             | 72%                      | 73%                        |
| Saudi Arabia          | SAU  | 74,038        | 382,315       | 99%                            | 70                             | 100%                     | 100%                       |
| Senegal               | SEN  | 6,788         | 4,756         | 91%                            | 13                             | 63%                      | 62%                        |
| Serbia                | SRB  | 16,613        | 140,709       | 100%                           | 71                             | 100%                     | 100%                       |
| Sierra Leone          | SLE  | 2,540         | 1,032         | 70%                            | 12                             | 21%                      | 23%                        |
| Singapore             | SGP  | 248           | 37,077        | 100%                           | 1                              | 99%                      | 100%                       |
| Slovakia              | SVK  | 10,400        | 138,964       | 100%                           | 57                             | 100%                     | 100%                       |
| Slovenia              | SVN  | 5,078         | 59,572        | 100%                           | 73                             | 100%                     | 100%                       |
| Somalia               | SOM  | 923           | 1,440         | 16%                            | 3                              | 23%                      | 33%                        |
| South Africa          | ZAF  | 89,639        | 58,579        | 100%                           | 49                             | 87%                      | 84%                        |
| South Sudan           | SSD  | 2,513         | 304           | 20%                            | 6                              | 7%                       | 25%                        |
| Spain                 | ESP  | 85,647        | 808,845       | 95%                            | 56                             | 100%                     | 100%                       |
| Sri Lanka             | LKA  | 11,059        | 399,763       | 100%                           | 16                             | 99%                      | 98%                        |
| Sudan                 | SDN  | 15,509        | 9,035         | 65%                            | 12                             | 37%                      | 56%                        |
| Suriname              | SUR  | 1,462         | 1,003         | 92%                            | 75                             | 86%                      | 97%                        |
| Swaziland             | SWZ  | 2,865         | 806           | 100%                           | 65                             | 50%                      | 74%                        |
| Sweden                | SWE  | 53,622        | 194,541       | 100%                           | 165                            | 100%                     | 100%                       |
| Switzerland           | CHE  | 7,824         | 182,703       | 100%                           | 27                             | 100%                     | 100%                       |

| Country                     | Code | Total MV (km) | Total LV (km) | Population with 10km of MV (%) | MV investment per capita (USD) | Modelled access rate (%) | World Bank access rate (%) |
|-----------------------------|------|---------------|---------------|--------------------------------|--------------------------------|--------------------------|----------------------------|
| Syrian Arab Republic        | SYR  | 15,302        | 281,785       | 99%                            | 25                             | 100%                     | 90%                        |
| Taiwan                      | TWN  | 6,383         | 289,720       | 100%                           | 8                              | 100%                     | 100%                       |
| Tajikistan                  | TJK  | 9,048         | 80,315        | 99%                            | 31                             | 100%                     | 99%                        |
| Thailand                    | THA  | 78,248        | 1,086,942     | 100%                           | 34                             | 100%                     | 100%                       |
| Timor-Leste                 | TLS  | 1,588         | 1,873         | 100%                           | 39                             | 71%                      | 80%                        |
| Togo                        | TGO  | 5,287         | 2,458         | 99%                            | 21                             | 47%                      | 48%                        |
| Tonga                       | TON  | 88            | 404           | 79%                            | 25                             | 95%                      | 98%                        |
| Tunisia                     | TUN  | 16,196        | 147,475       | 100%                           | 43                             | 100%                     | 100%                       |
| Turkey                      | TUR  | 171,359       | 1,057,026     | 100%                           | 65                             | 100%                     | 100%                       |
| Turkmenistan                | TKM  | 16,469        | 53,702        | 100%                           | 89                             | 97%                      | 100%                       |
| Uganda                      | UGA  | 12,675        | 5,152         | 92%                            | 10                             | 25%                      | 22%                        |
| Ukraine                     | UKR  | 93,036        | 1,058,713     | 100%                           | 62                             | 100%                     | 100%                       |
| United Arab Emirates        | ARE  | 6,419         | 77,177        | 100%                           | 21                             | 100%                     | 100%                       |
| United Kingdom              | GBR  | 55,914        | 1,065,331     | 100%                           | 26                             | 100%                     | 100%                       |
| United Republic of Tanzania | TZA  | 25,713        | 10,088        | 86%                            | 14                             | 34%                      | 33%                        |
| United States               | USA  | 959,811       | 8,647,420     | 100%                           | 92                             | 100%                     | 100%                       |
| Uruguay                     | URY  | 8,107         | 53,427        | 99%                            | 69                             | 100%                     | 100%                       |
| Uzbekistan                  | UZB  | 29,202        | 451,238       | 100%                           | 29                             | 100%                     | 100%                       |
| Venezuela                   | VEN  | 36,953        | 384,899       | 99%                            | 35                             | 100%                     | 100%                       |
| Viet Nam                    | VNM  | 37,526        | 971,327       | 100%                           | 12                             | 100%                     | 100%                       |
| Yemen                       | YEM  | 7,731         | 18,597        | 84%                            | 9                              | 91%                      | 79%                        |
| Zambia                      | ZMB  | 18,605        | 4,042         | 91%                            | 33                             | 26%                      | 40%                        |
| Zimbabwe                    | ZWE  | 16,486        | 4,812         | 88%                            | 31                             | 36%                      | 40%                        |
